# Supplementary material
Source: PubMed Central journal article supplement (PMC2905313)
Supplement: NIHMS207340-supplement-1_si_001.pdf [file NIHMS207340-supplement-1_si_001.pdf]

# SUPPORTING INFORMATION

## Bryonolic Acid: A Large-Scale Isolation and Evaluation of Heme Oxygenase 1

### Expression in Activated Macrophages

Emily C. Barker, Tonibelle N. Gatbonton-Schwager, Yong Han,  
Jennifer E. Clay, John J. Letterio, and Gregory P. Tochtrop

Department of Chemistry, Department of Pharmacology, Department of Pediatrics,

Case Western Reserve University, Cleveland, Ohio 44106

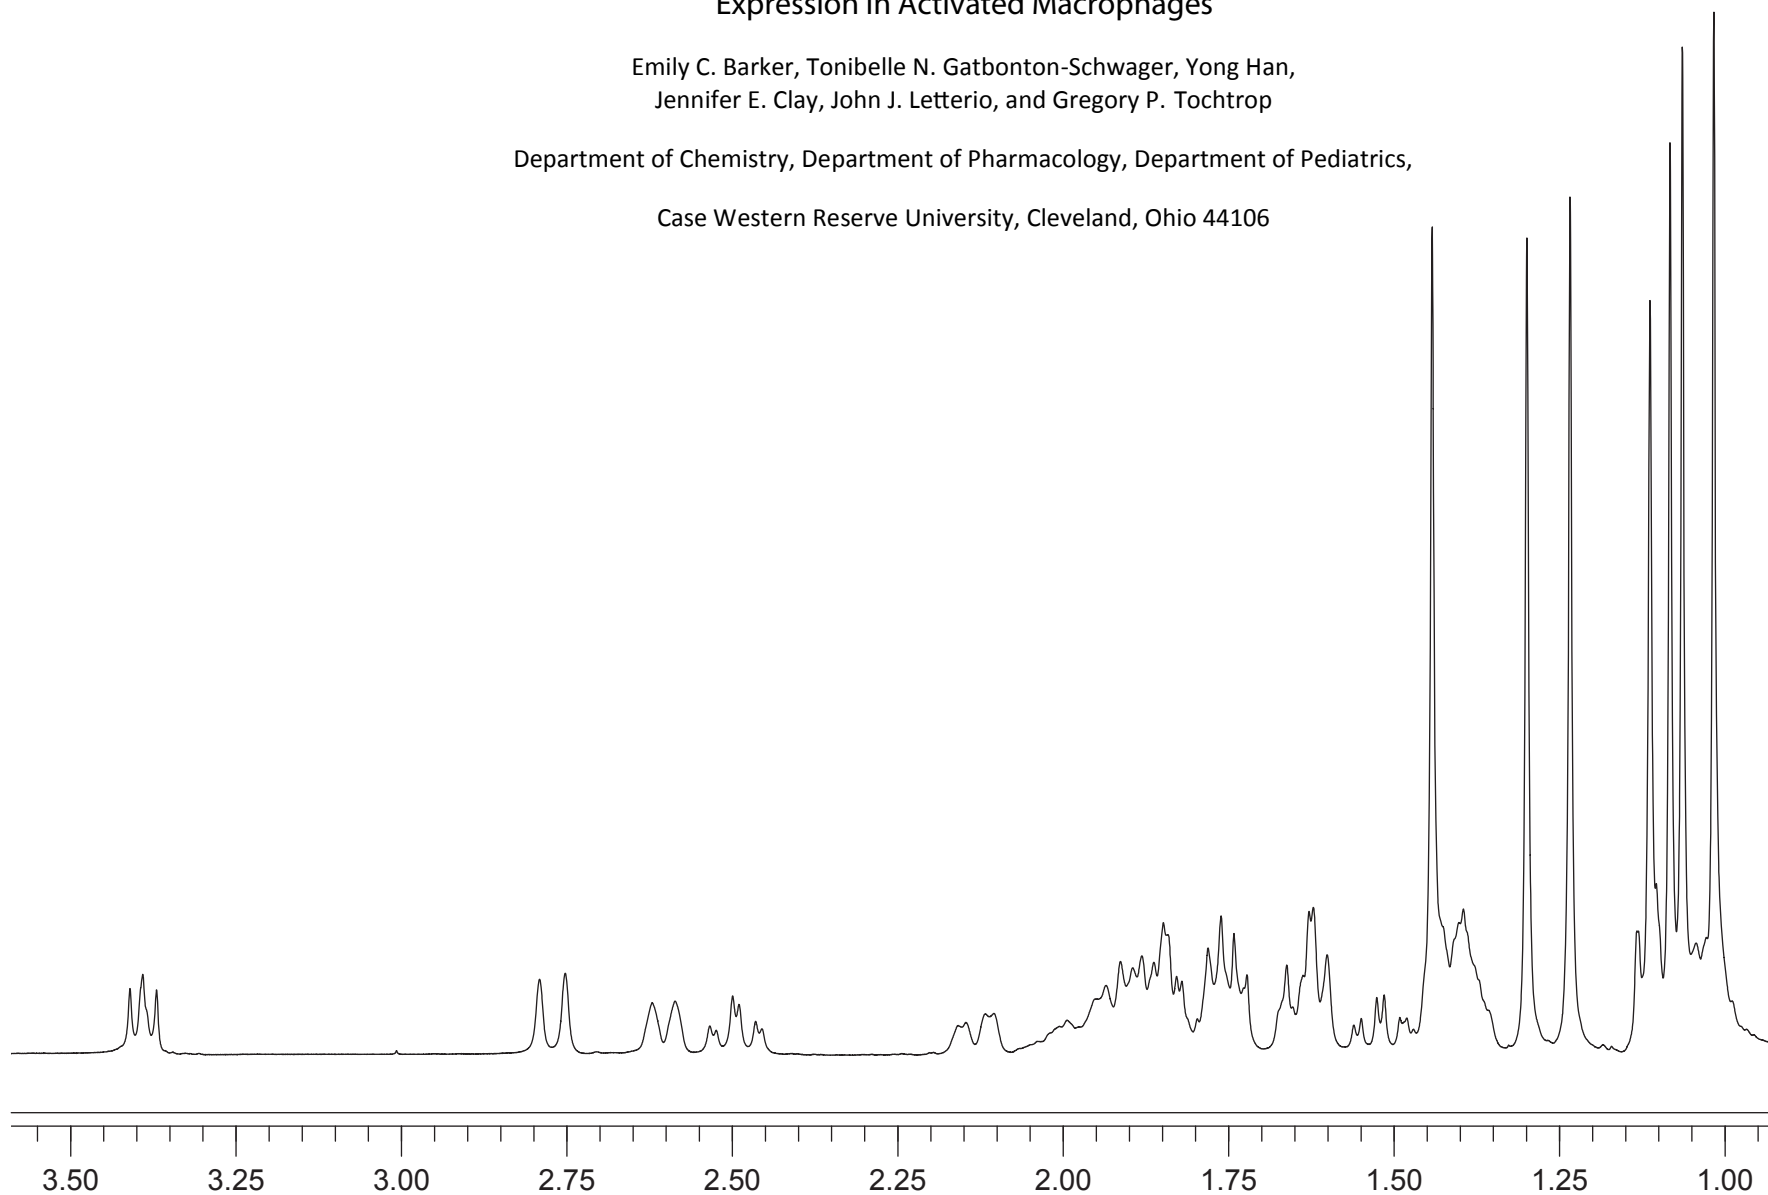

S1: <sup>1</sup>H NMR (400 MHz, pyridine-*d*<sub>5</sub>) of bryonolic acid.

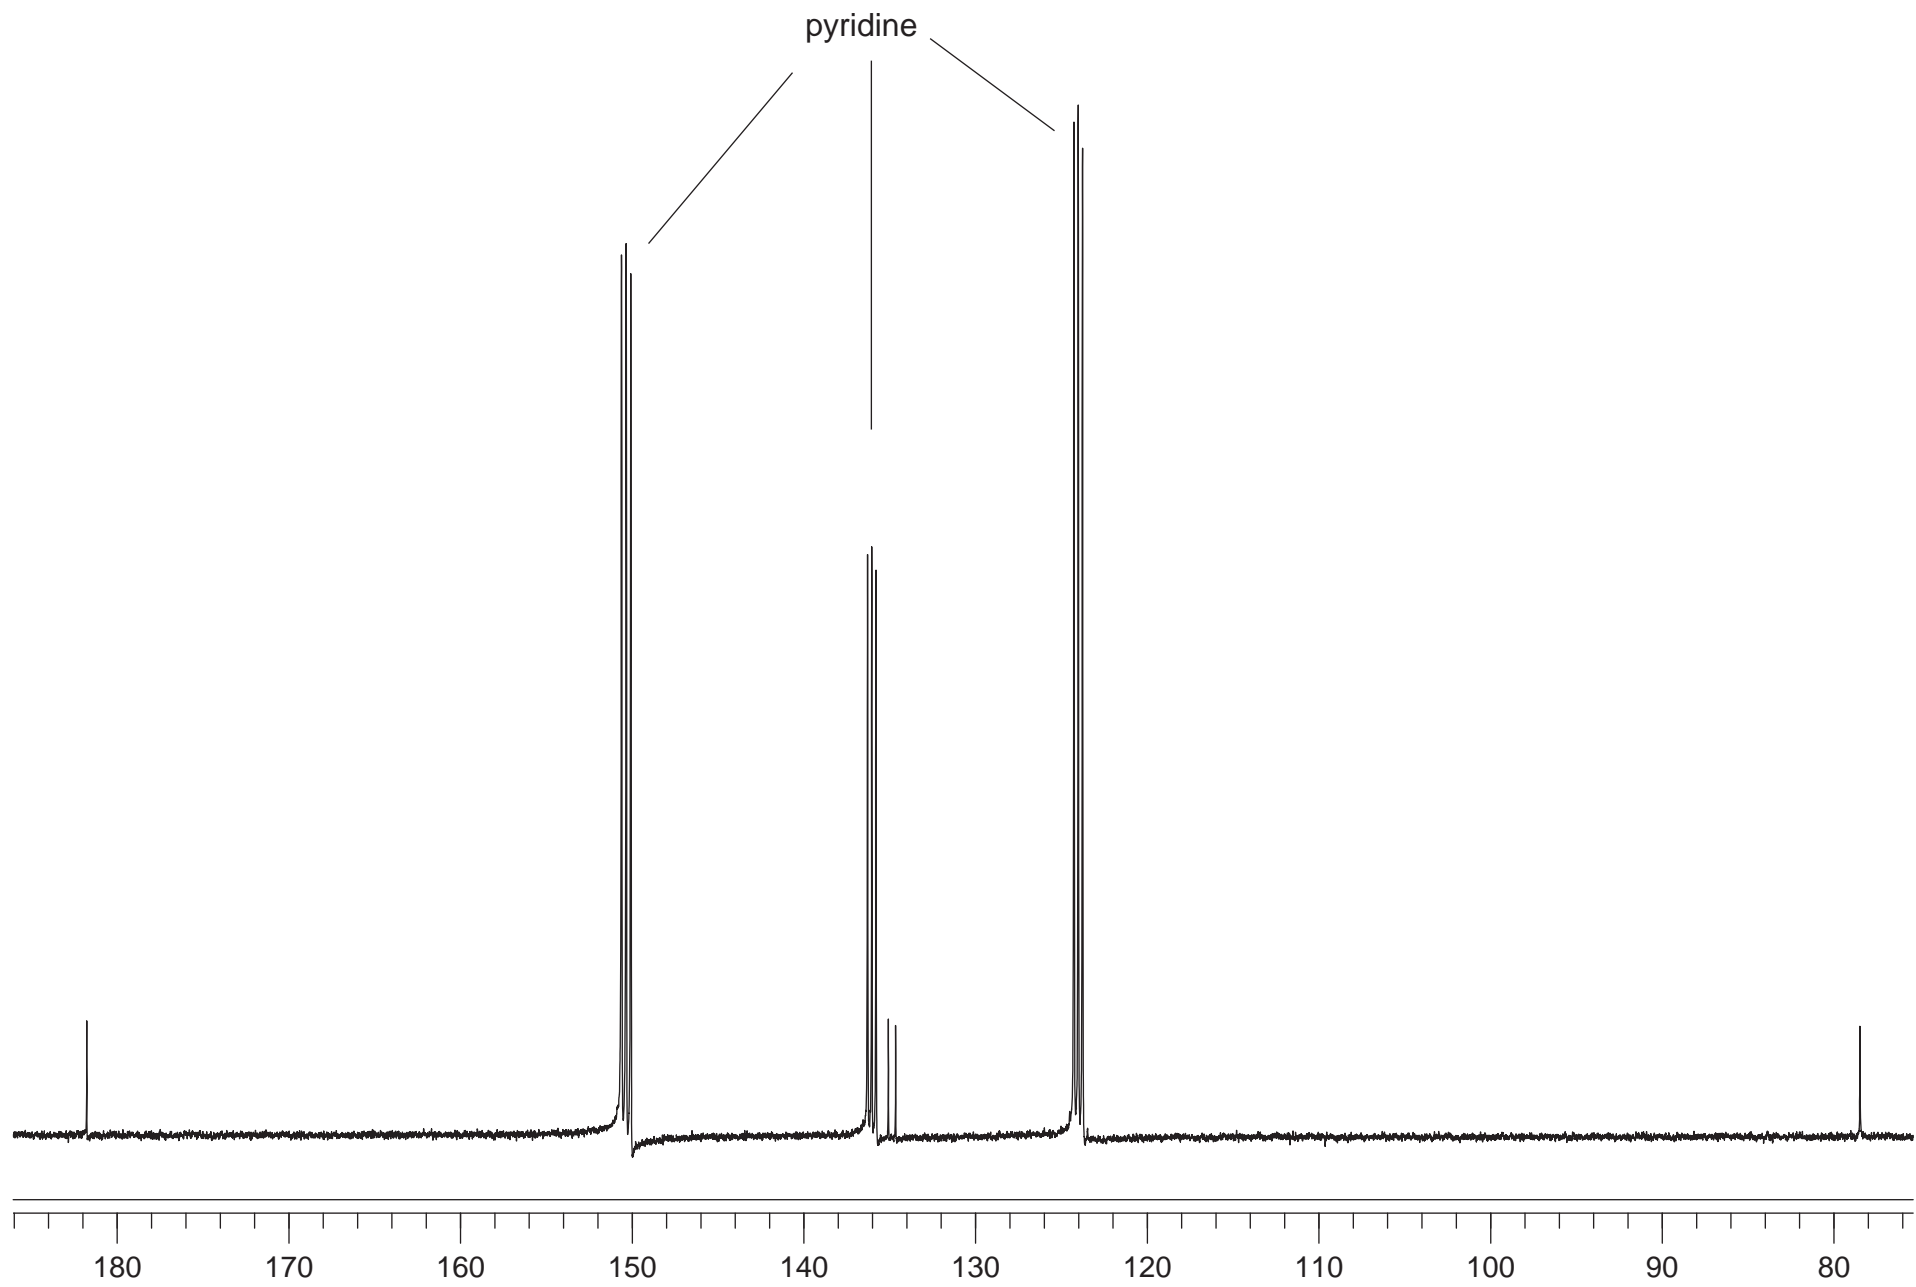

S2:  $^{13}\text{C}$  NMR (100 MHz, pyridine- $d_5$ ) of bryonolic acid, 80-180 ppm.

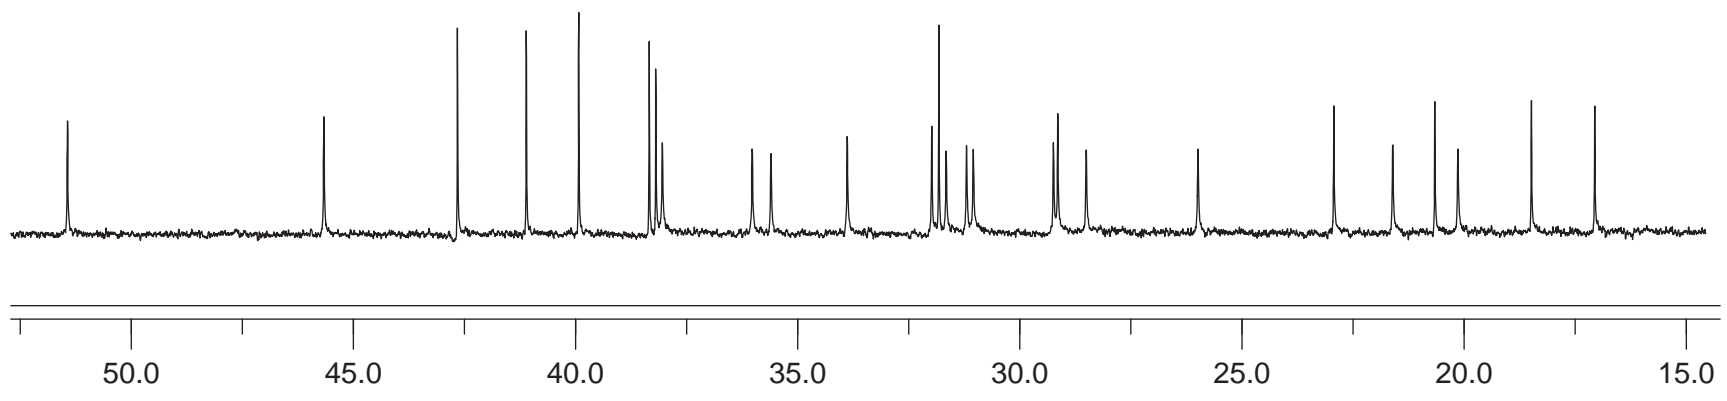

S3:  $^{13}\text{C}$  NMR (100 MHz,  $\text{pyridine-}d_5$ ) of bryonolic acid, 15-55 ppm.
